# Supplementary material for: The Spread of the COVID-19 Outbreak in Brazil: An Overview by Kohonen Self-Organizing Map Networks
Source: PubMed Central journal article supplement (PMC7999572; doi:10.3390/medicina57030235), 2021-03-03
Supplement: medicina-57-00235-s001.pdf [file medicina-57-00235-s001.pdf]

# The Spread of the COVID-19 Outbreak in Brazil: An Overview by Kohonen Self-Organizing Map Networks

Diego Galvan <sup>1,2,3,\*</sup>, Luciane Effting <sup>4</sup>, Hágata Cremasco <sup>4</sup> and Carlos Adam Conte-Junior <sup>1,2,3</sup>

- <sup>1</sup> COVID-19 Research Group, Center for Food Analysis (NAL), Technological Development Support Laboratory (LADETEC), Cidade Universitária, Rio de Janeiro, RJ 21941-598, Brazil; conte@iq.ufrj.br
  - <sup>2</sup> Laboratory of Advanced Analysis in Biochemistry and Molecular Biology (LAABBM), Department of Biochemistry, Federal University of Rio de Janeiro (UFRJ), Cidade Universitária, Rio de Janeiro, RJ 21941-909, Brazil
  - <sup>3</sup> Nanotechnology Network, Carlos Chagas Filho Research Support Foundation of the State of Rio de Janeiro (FAPERJ), Rio de Janeiro, RJ 20020-000, Brazil
  - <sup>4</sup> Chemistry Department, State University of Londrina (UEL), Londrina, PR 86057-970, Brazil; luciane.effting@uel.br (L.E.); hagata@uel.br (H.C.)
- \* Correspondence: diegogalvann@gmail.com or diegogalvann@iq.ufrj.br

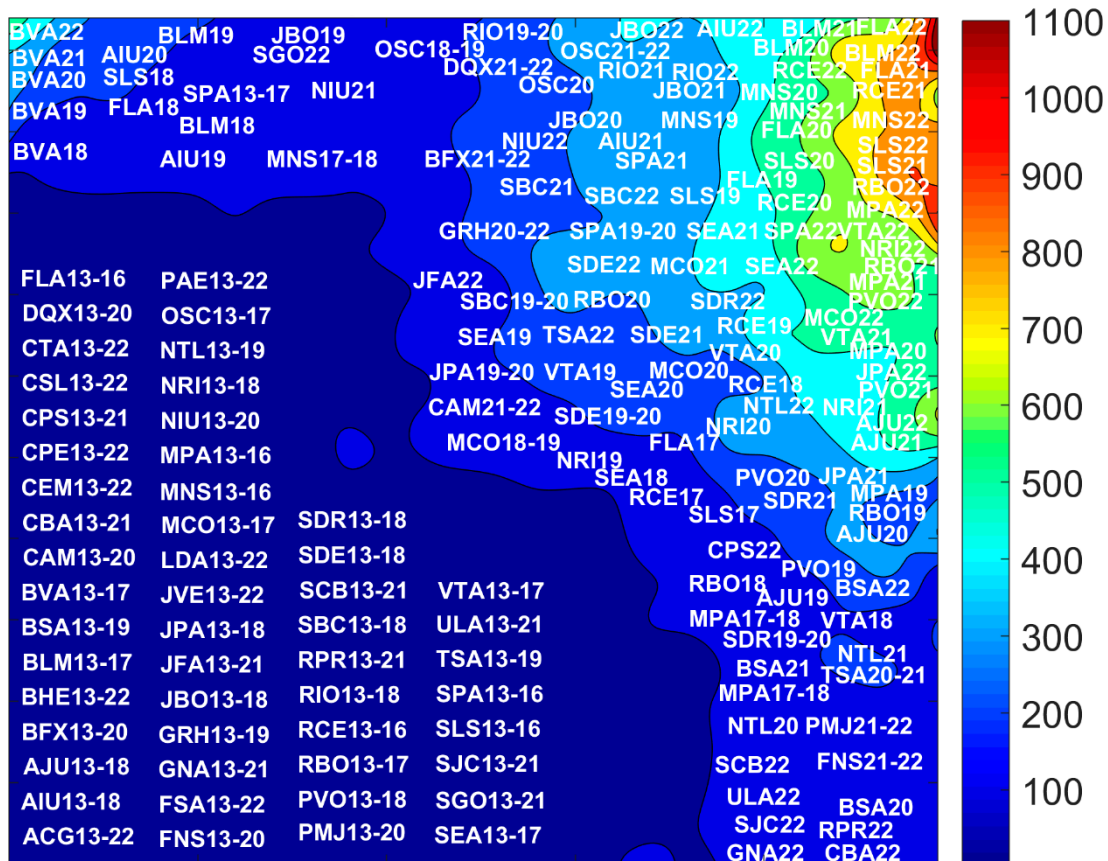

Figure S1 – Temporal aspect of the COVID-19 spread in Brazilian cities per 100 thousand inhabitants. (Cumulative cases).

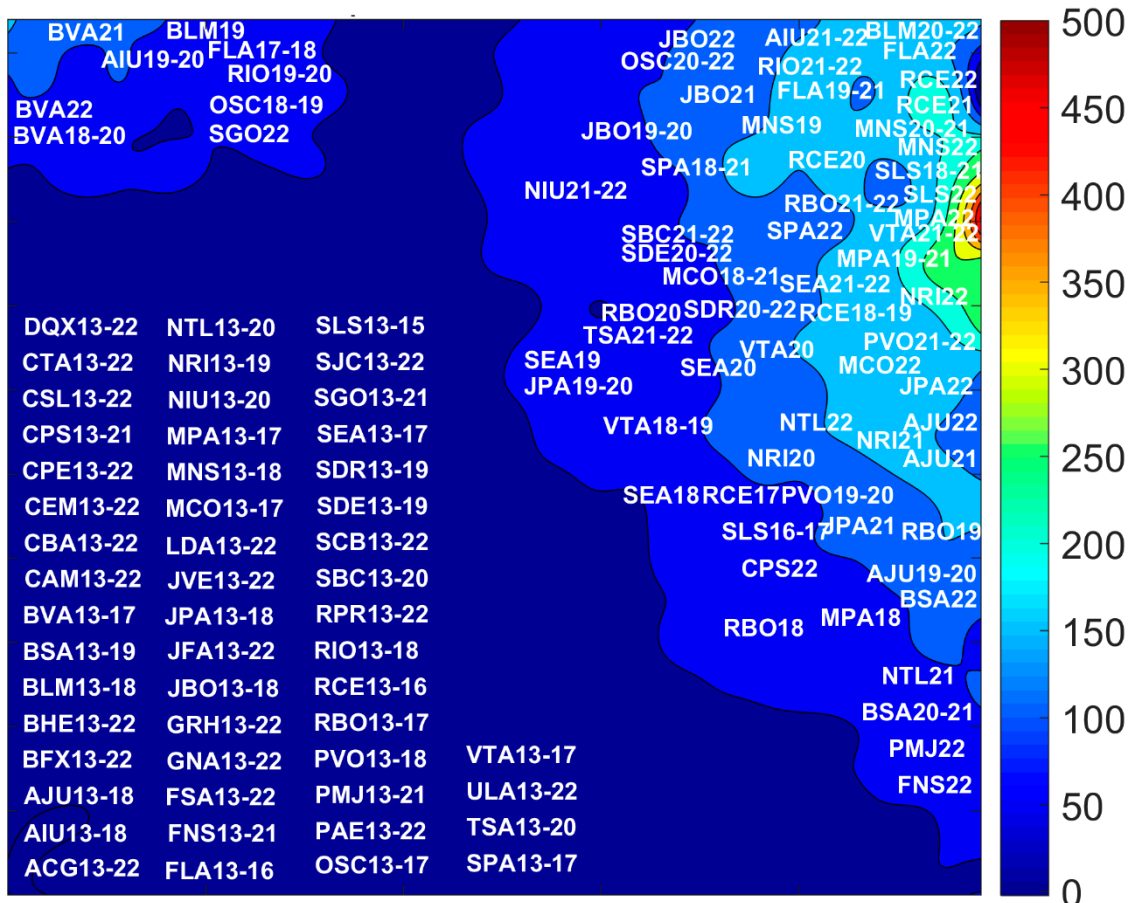

Figure S2 – Temporal aspect of the COVID-19 spread in Brazilian cities per 100 thousand inhabitants. (Novel cases).

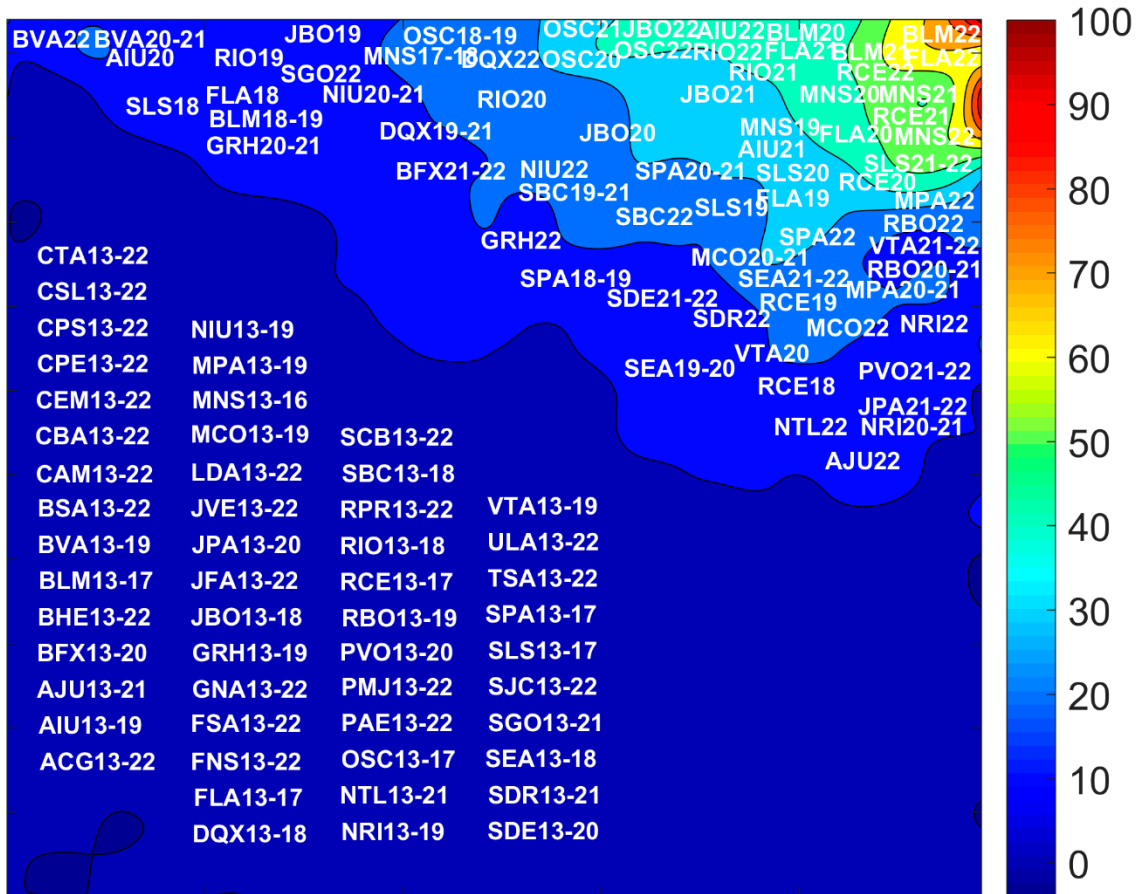

**Figure S3** – Temporal aspect of the COVID-19 spread in Brazilian cities per 100 thousand inhabitants. (Cumulative deaths).

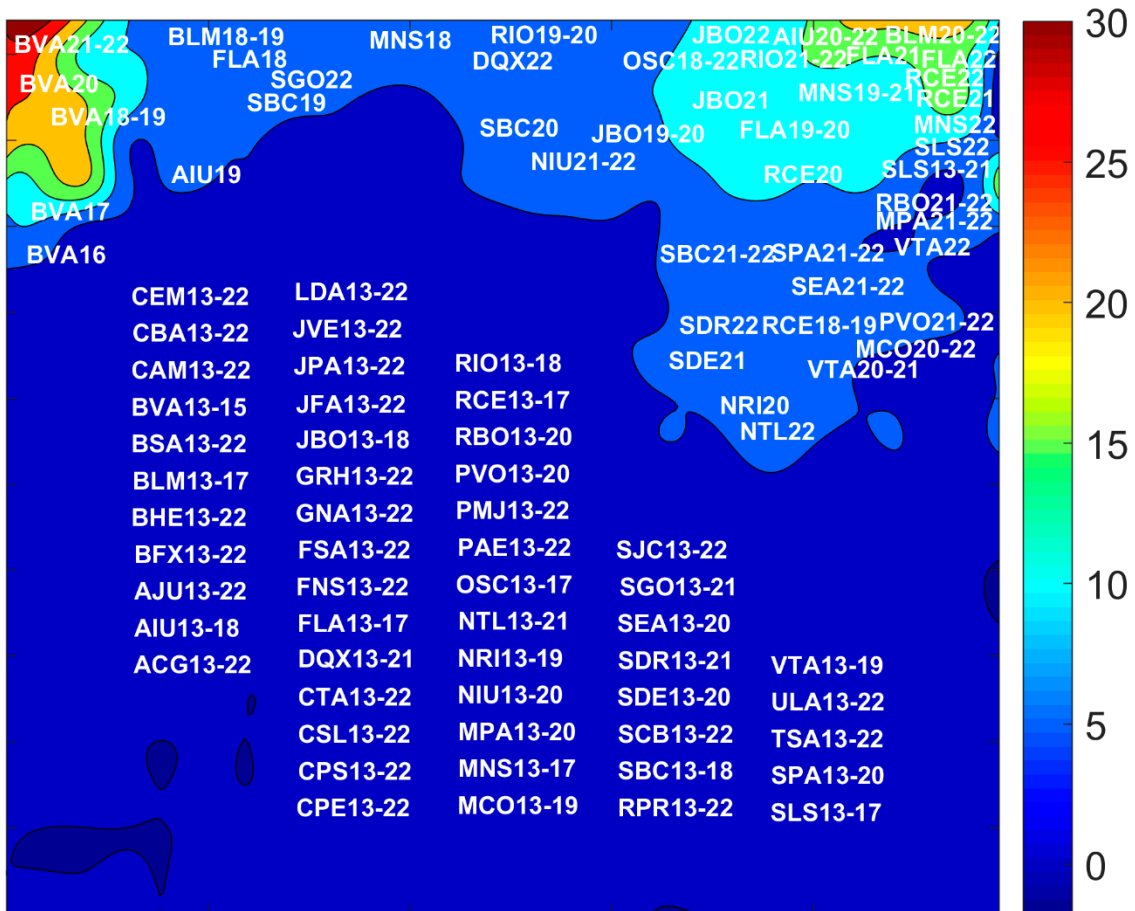

**Figure S4** – Temporal aspect of the COVID-19 spread in Brazilian cities per 100 thousand inhabitants. (Novel deaths).
